# Supplementary material
Source: publisher site journal article supplement (https://www.dovepress.com/article/238189)

Supplementary Figure 1. Role of TUG1 knockdown in normal PBMC (nPBMC) cells. (A-F) nPBMC cells were transfected with TUG1 siRNA (si-TUG1) or its negative control si-NC. (A) RT-qPCR analyzed TUG1 expression level after transfection. (B) Cell viability was measured by MTT assay. (C, D) The glucose consumption and lactate production in the cell supernatant of transfected cells were measured by commercial kits. (E) Western blot assay examined expression of hexokinase 2 (HK2) after transfection. (F) Apoptotic rate was determined using flow cytometry. The error bars represent the mean ± SEM of three independent experiments. ****p*< 0.001 compared with si-NC group.


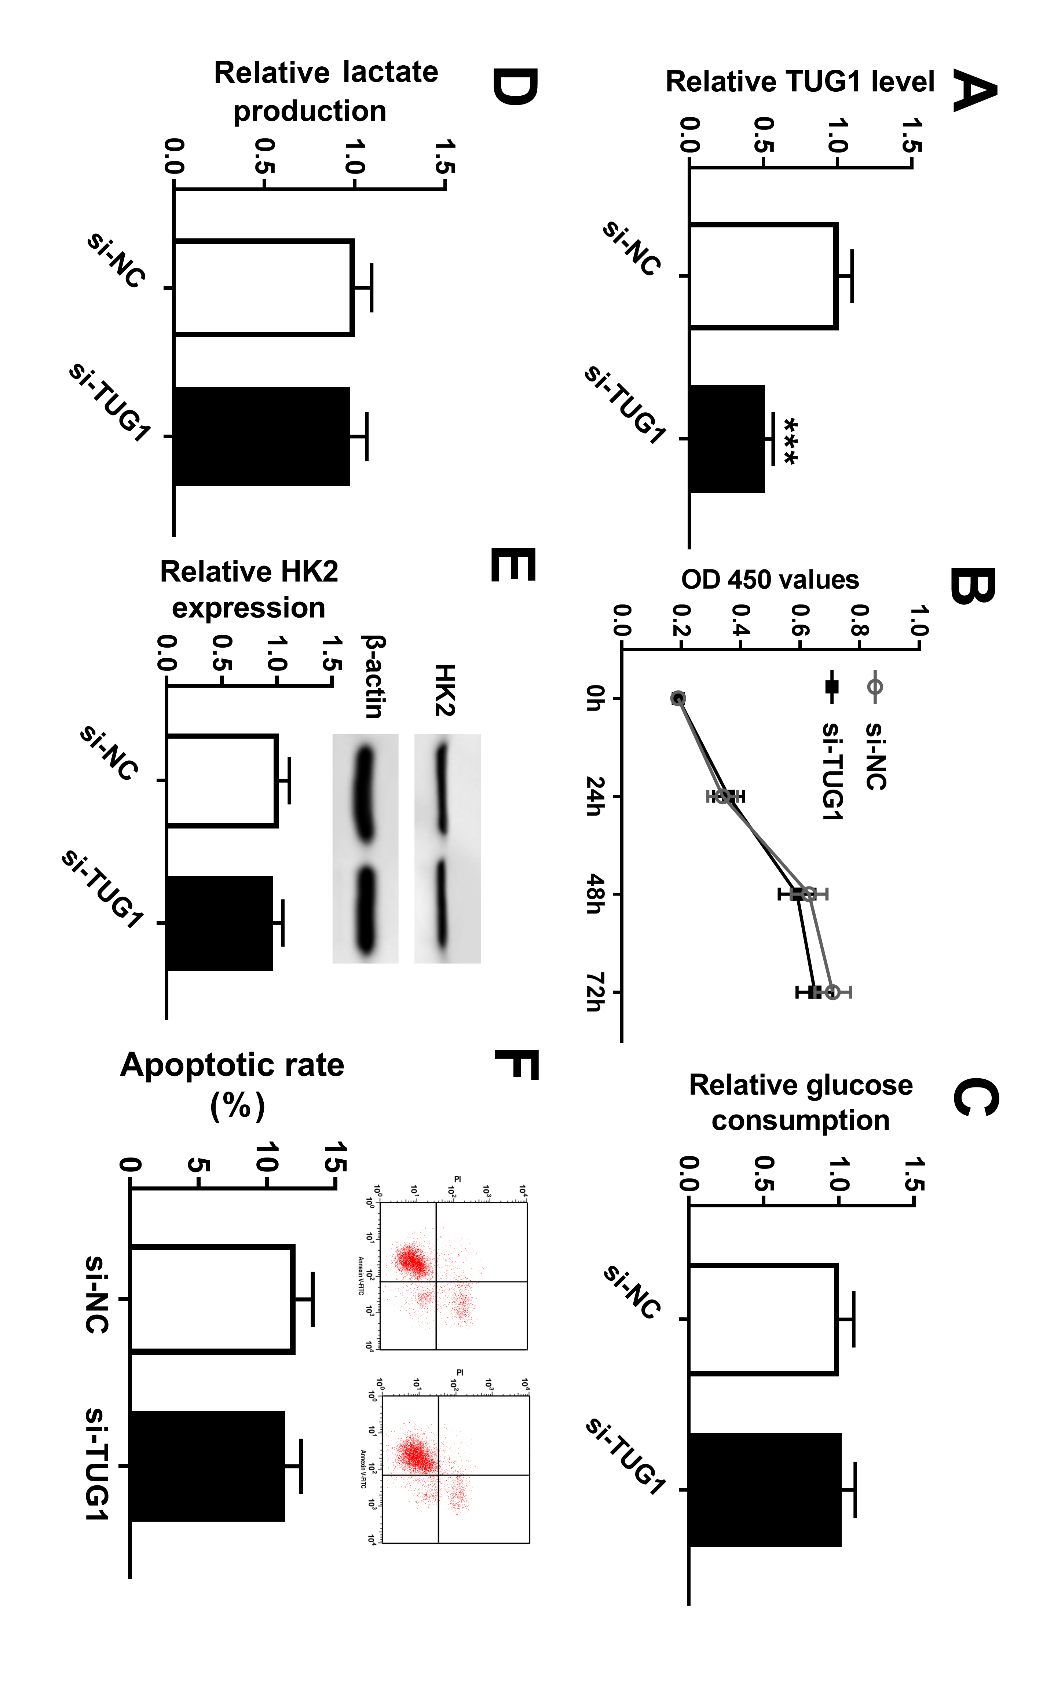

Supplement: Supplementary file 1 [file get_supplementary_file.php]
